# Supplementary material
Source: MDPI journal article supplement (https://www.mdpi.com/2071-1050/12/23/10213)
Supplement: s1 [file s1]

# Supplementary Information

## Contents

|                                  |   |
|----------------------------------|---|
| A. PRE-EVENT QUESTIONNAIRE ..... | 2 |
| B. KAHOOT QUIZ .....             | 3 |
| C. MAPS OF THE STUDY AREA.....   | 5 |
| D. DATA GATHERING SHEET .....    | 7 |

## A. PRE-EVENT QUESTIONNAIRE

Table S1: Results of the pre-event questionnaire

| <b>Q1. What is noise?</b>                                                                                                                                             | <b>No. of respondents</b> |
|-----------------------------------------------------------------------------------------------------------------------------------------------------------------------|---------------------------|
| a) I don't know                                                                                                                                                       | 2                         |
| b) A loud pleasant sound                                                                                                                                              | 6                         |
| c) A sound, that is loud or unpleasant and that causes disturbance                                                                                                    | 54                        |
| <b>Q 2. Do you think your school is in a noisy environment?</b>                                                                                                       |                           |
| a) Yes                                                                                                                                                                | 17                        |
| b) No                                                                                                                                                                 | 37                        |
| <b>Q 3. If you answered "Yes" to the previous question, specify one or more sources of noise outside your school.</b>                                                 |                           |
| a) Cars                                                                                                                                                               | 17                        |
| b) Train                                                                                                                                                              | 4                         |
| c) Airplanes                                                                                                                                                          | 3                         |
| d) Factories                                                                                                                                                          | 1                         |
| e) Other: _____                                                                                                                                                       | tractor, sirens           |
| <b>Q 4. Do you think it is noisy inside your school?</b>                                                                                                              |                           |
| a) Yes                                                                                                                                                                | 41                        |
| b) No                                                                                                                                                                 | 13                        |
| <b>Q 5. If you answered "Yes" to the previous question, specify one or more sources of noise inside your school.</b>                                                  |                           |
| a) Door creaking/rattling                                                                                                                                             | 3                         |
| b) Rumbling in the kitchen/dining area                                                                                                                                | 14                        |
| c) Children screaming                                                                                                                                                 | 38                        |
| d) Loud speaking                                                                                                                                                      | 26                        |
| e) Buzzing of ventilation system and electronics                                                                                                                      | 3                         |
| f) Walking, running down the hall                                                                                                                                     | 14                        |
| d) Other: _____                                                                                                                                                       | /                         |
| <b>Q6. In the picture below, indicate how much does noise bother, disturb or annoy you, when you are here at school.</b>                                              |                           |
| 1 (A little)                                                                                                                                                          | 6                         |
| 2                                                                                                                                                                     | 13                        |
| 3                                                                                                                                                                     | 14                        |
| 4                                                                                                                                                                     | 13                        |
| 5 (A lot)                                                                                                                                                             | 8                         |
| <b>Q7. Which number between zero and ten best reflects to what extent noise (source of noise) annoys, disturbs or upsets you? (0 means the least and 10 the most)</b> |                           |
| 0                                                                                                                                                                     | 4                         |
| 1                                                                                                                                                                     | 3                         |

|                                                                                                |                                  |
|------------------------------------------------------------------------------------------------|----------------------------------|
| 2                                                                                              | 3                                |
| 3                                                                                              | 4                                |
| 4                                                                                              | 8                                |
| 5                                                                                              | 9                                |
| 6                                                                                              | 1                                |
| 7                                                                                              | 4                                |
| 8                                                                                              | 7                                |
| 9                                                                                              | 6                                |
| 10                                                                                             | 5                                |
| <b>Q8. How do you feel when you are exposed to noise? You can choose more than one answer.</b> |                                  |
| a) Agitated                                                                                    | 13                               |
| b) I can't concentrate                                                                         | 33                               |
| c) I can't hear my friends, teachers                                                           | 37                               |
| d) Nervous                                                                                     | 15                               |
| e) Angry                                                                                       | 15                               |
| f) My ears hurt                                                                                | 20                               |
| d) Other: _____                                                                                | sad, furious,<br>not<br>bothered |

## B. KAHOOT QUIZ

**Table S2:** Results of the Kahoot quiz (1- correct answer, 0- incorrect answer)

| Questions                                                                               | Group 1 | Group 2 | Group 3 |
|-----------------------------------------------------------------------------------------|---------|---------|---------|
| Q1. What is sound?                                                                      | 1       | 1       | 1       |
| Q2. How does sound travel?                                                              | 1       | 1       | 1       |
| Q3. In which substance does sound travel the fastest?                                   | 0       | 0       | 0       |
| Q4. In which substance does sound NOT travel?                                           | 1       | 1       | 1       |
| Q5. Which of the following statements is NOT correct?                                   | 0       | 0       | 1       |
| Q6. Animals communicate through sound.                                                  | 1       | 1       | 1       |
| Q7. Cricket has no vocal cords. He emits sound by rubbing his wings against each other. | 1       | 1       | 1       |
| Q8. Which animal is the loudest?                                                        | 0       | 0       | 1       |
| Q9. A loud sound unpleasant to the ears is called noise.                                | 1       | 1       | 1       |

|                                                                               |   |   |   |
|-------------------------------------------------------------------------------|---|---|---|
| Q10. Which sound is the loudest?                                              | 1 | 1 | 1 |
| Q11. Which sound is the quietest?                                             | 1 | 1 | 1 |
| Q12. How people perceive sound?                                               | 1 | 1 | 1 |
| Q13. What does a “snail” do in our ear?                                       | 1 | 0 | 1 |
| Q14. A doctor, a specialist for ear diseases is called                        | 1 | 1 | 1 |
| Q15. What is the difference between sound and noise?                          | 1 | 1 | 1 |
| Q16. Miha’s father works in a noisy factory. To protect his hearing, he uses: | 1 | 1 | 1 |
| Q17. Unit for noise measurement is:                                           | 1 | 1 | 1 |
| Q18. Before we start measuring noise, we need to calibrate the device.        | 1 | 1 | 1 |
| Q19. When we perform the measurement, we talk and sing along.                 | 1 | 1 | 1 |
| Q20. Where should the device be when performing the measurement?              | 1 | 1 | 1 |
| Q21. The closer we get to a bigger busy road                                  | 1 | 1 | 1 |
| Q22. What can we do for our own well-being and hearing?                       | 0 | 1 | 1 |

## C. MAPS OF THE STUDY AREA

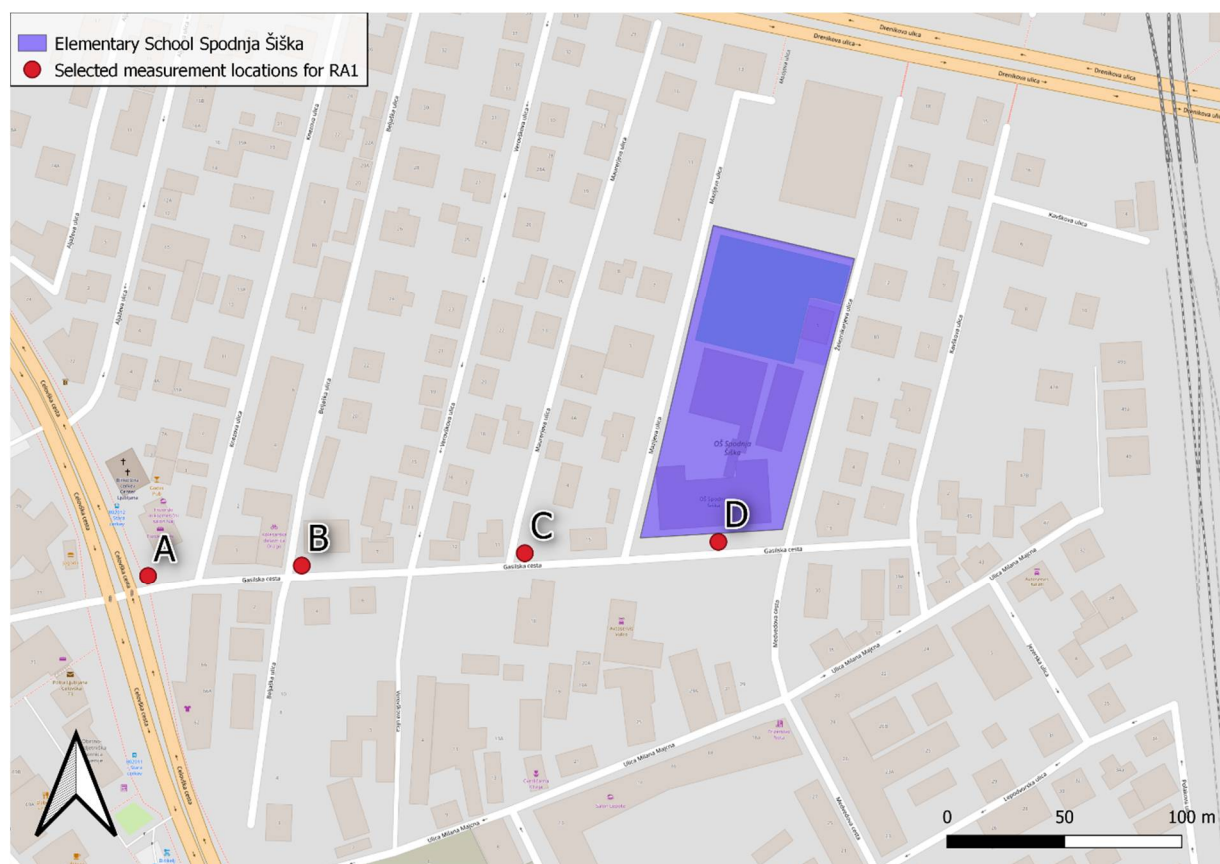

**Figure S1.** Map of the area surrounding the school with selected measurement locations for RA1

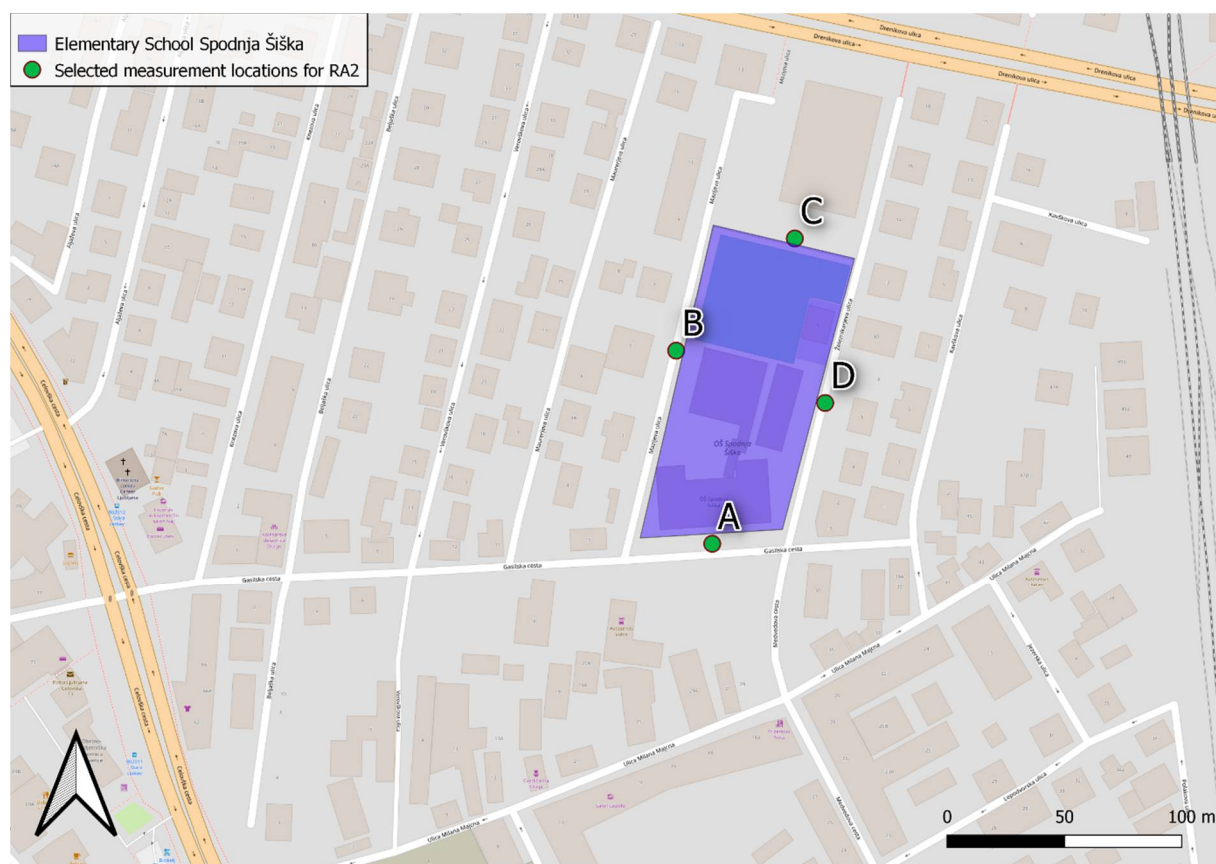

**Figure S2.** Map of the area surrounding the school with selected measurement locations for RA2

D. DATA GATHERING SHEET

Table S3: Data gathering sheet

| Location | Perceived noise level<br><i>(very quiet, quiet, medium loud, loud or very loud)</i> | Time and date | Min dB(A) | LA90 | LA50 | LA10 | Max dB(A) | Leq dB(A) |
|----------|-------------------------------------------------------------------------------------|---------------|-----------|------|------|------|-----------|-----------|
| A        |                                                                                     |               |           |      |      |      |           |           |
| B        |                                                                                     |               |           |      |      |      |           |           |
| C        |                                                                                     |               |           |      |      |      |           |           |
| D        |                                                                                     |               |           |      |      |      |           |           |
| E        |                                                                                     |               |           |      |      |      |           |           |
